# Supplementary material
Source: publisher site journal article supplement (https://www.dovepress.com/article/449706)
Supplement: Supplementary file 1 [file get_supplementary_file.php]

## Supplementary Material

**Supplementary Table 1.** Association between maternal pre-pregnancy BMI and maternal FPG in first trimester.

|         | <b>Beta (95%CI)</b>  | <b><i>P</i></b> |
|---------|----------------------|-----------------|
| Model 1 | 0.011 (0.007, 0.015) | <0.001          |
| Model 2 | 0.010 (0.006, 0.015) | <0.001          |

Model 1 adjusted for maternal age, education level, physical activity level.

Model 2 further adjusted for parity, family history of hypertension disease, and family history of diabetes.

**Supplementary Table 2.** A stratified analysis for maternal age, parity, family history of diabetes, and fetal sex.

| Variable              | Beta/OR | 95%CI  |       | P     | Beta/OR | 95%CI  |       | P     |
|-----------------------|---------|--------|-------|-------|---------|--------|-------|-------|
|                       |         | Lower  | Upper |       |         | Lower  | Upper |       |
|                       |         | Age<35 |       |       | Age≥35  |        |       |       |
| <b>Mid pregnancy</b>  |         |        |       |       |         |        |       |       |
| HC                    | 0.002   | -0.010 | 0.013 | 0.789 | 0.000   | -0.006 | 0.006 | 0.983 |
| AC                    | 0.015   | 0.001  | 0.028 | 0.036 | 0.011   | 0.003  | 0.018 | 0.005 |
| FL                    | 0.005   | -0.011 | 0.022 | 0.524 | 0.010   | 0.000  | 0.020 | 0.041 |
| EFW                   | 0.024   | 0.007  | 0.041 | 0.006 | 0.018   | 0.008  | 0.028 | 0.000 |
| <b>Late pregnancy</b> |         |        |       |       |         |        |       |       |
| HC                    | 0.015   | -0.005 | 0.035 | 0.148 | -0.014  | -0.073 | 0.046 | 0.652 |
| AC                    | 0.013   | -0.004 | 0.031 | 0.141 | 0.001   | -0.044 | 0.046 | 0.962 |
| FL                    | 0.019   | -0.001 | 0.039 | 0.062 | 0.018   | -0.035 | 0.071 | 0.510 |
| EFW                   | 0.015   | 0.001  | 0.030 | 0.039 | 0.013   | 0.005  | 0.021 | 0.001 |
| <b>Birth size</b>     |         |        |       |       |         |        |       |       |
| Height                | 0.012   | -0.008 | 0.033 | 0.236 | 0.019   | 0.008  | 0.030 | 0.001 |
| Weight                | 0.033   | 0.015  | 0.051 | 0.000 | 0.034   | 0.024  | 0.043 | 0.000 |
| <b>birth outcome</b>  |         |        |       |       |         |        |       |       |
| PB                    | 1.035   | 0.981  | 1.091 | 0.207 | 0.954   | 0.871  | 1.046 | 0.320 |
| LGA                   | 1.131   | 1.095  | 1.168 | 0.000 | 1.111   | 1.050  | 1.176 | 0.000 |
| LBW                   | 0.989   | 0.933  | 1.049 | 0.712 | 0.971   | 0.873  | 1.080 | 0.591 |

|            |       |       |       |       |       |       |       |       |
|------------|-------|-------|-------|-------|-------|-------|-------|-------|
| Macrosomia | 1.140 | 1.085 | 1.197 | 0.000 | 1.137 | 1.039 | 1.245 | 0.005 |
|------------|-------|-------|-------|-------|-------|-------|-------|-------|

Parity=0

Parity≥1

**Mid pregnancy**

|    |       |        |       |       |        |        |       |       |
|----|-------|--------|-------|-------|--------|--------|-------|-------|
| HC | 0.001 | -0.006 | 0.007 | 0.785 | -0.003 | -0.014 | 0.008 | 0.583 |
|----|-------|--------|-------|-------|--------|--------|-------|-------|

|    |       |       |       |       |       |        |       |       |
|----|-------|-------|-------|-------|-------|--------|-------|-------|
| AC | 0.012 | 0.004 | 0.019 | 0.002 | 0.012 | -0.002 | 0.025 | 0.095 |
|----|-------|-------|-------|-------|-------|--------|-------|-------|

|    |       |        |       |       |       |        |       |       |
|----|-------|--------|-------|-------|-------|--------|-------|-------|
| FL | 0.009 | -0.001 | 0.019 | 0.072 | 0.008 | -0.008 | 0.023 | 0.334 |
|----|-------|--------|-------|-------|-------|--------|-------|-------|

|     |       |       |       |       |       |       |       |       |
|-----|-------|-------|-------|-------|-------|-------|-------|-------|
| EFW | 0.020 | 0.010 | 0.030 | 0.000 | 0.016 | 0.001 | 0.032 | 0.041 |
|-----|-------|-------|-------|-------|-------|-------|-------|-------|

**Late pregnancy**

|    |        |        |       |       |       |        |       |       |
|----|--------|--------|-------|-------|-------|--------|-------|-------|
| HC | -0.010 | -0.069 | 0.049 | 0.741 | 0.008 | -0.011 | 0.027 | 0.419 |
|----|--------|--------|-------|-------|-------|--------|-------|-------|

|    |        |        |       |       |       |       |       |       |
|----|--------|--------|-------|-------|-------|-------|-------|-------|
| AC | -0.003 | -0.048 | 0.042 | 0.899 | 0.024 | 0.005 | 0.043 | 0.012 |
|----|--------|--------|-------|-------|-------|-------|-------|-------|

|    |       |        |       |       |       |       |       |       |
|----|-------|--------|-------|-------|-------|-------|-------|-------|
| FL | 0.017 | -0.036 | 0.069 | 0.534 | 0.027 | 0.005 | 0.048 | 0.015 |
|----|-------|--------|-------|-------|-------|-------|-------|-------|

|     |       |       |       |       |       |       |       |       |
|-----|-------|-------|-------|-------|-------|-------|-------|-------|
| EFW | 0.011 | 0.004 | 0.019 | 0.004 | 0.023 | 0.008 | 0.038 | 0.003 |
|-----|-------|-------|-------|-------|-------|-------|-------|-------|

**Birth size**

|        |       |       |       |       |       |       |       |       |
|--------|-------|-------|-------|-------|-------|-------|-------|-------|
| Height | 0.017 | 0.006 | 0.028 | 0.002 | 0.021 | 0.000 | 0.041 | 0.048 |
|--------|-------|-------|-------|-------|-------|-------|-------|-------|

|        |       |       |       |       |       |       |       |       |
|--------|-------|-------|-------|-------|-------|-------|-------|-------|
| Weight | 0.033 | 0.023 | 0.043 | 0.000 | 0.037 | 0.020 | 0.055 | 0.000 |
|--------|-------|-------|-------|-------|-------|-------|-------|-------|

**birth outcome**

|    |       |       |       |       |       |       |       |       |
|----|-------|-------|-------|-------|-------|-------|-------|-------|
| PB | 1.045 | 0.990 | 1.104 | 0.113 | 1.086 | 0.983 | 1.199 | 0.103 |
|----|-------|-------|-------|-------|-------|-------|-------|-------|

|     |       |       |       |       |       |       |       |       |
|-----|-------|-------|-------|-------|-------|-------|-------|-------|
| LGA | 1.126 | 1.086 | 1.167 | 0.000 | 1.111 | 1.049 | 1.176 | 0.000 |
|-----|-------|-------|-------|-------|-------|-------|-------|-------|

|     |       |       |       |       |       |       |       |       |
|-----|-------|-------|-------|-------|-------|-------|-------|-------|
| LBW | 1.015 | 0.957 | 1.076 | 0.622 | 1.026 | 0.890 | 1.183 | 0.725 |
|-----|-------|-------|-------|-------|-------|-------|-------|-------|

|            |       |       |       |       |       |       |       |       |
|------------|-------|-------|-------|-------|-------|-------|-------|-------|
| Macrosomia | 1.145 | 1.085 | 1.209 | 0.000 | 1.103 | 1.006 | 1.209 | 0.037 |
|------------|-------|-------|-------|-------|-------|-------|-------|-------|

Female

Male

**Mid pregnancy**

|                       |                               |        |       |       |                                |        |       |       |
|-----------------------|-------------------------------|--------|-------|-------|--------------------------------|--------|-------|-------|
| HC                    | -0.001                        | -0.009 | 0.007 | 0.834 | 0.004                          | -0.004 | 0.012 | 0.339 |
| AC                    | 0.012                         | 0.002  | 0.021 | 0.014 | 0.012                          | 0.003  | 0.022 | 0.010 |
| FL                    | 0.006                         | -0.005 | 0.017 | 0.268 | 0.010                          | -0.002 | 0.022 | 0.117 |
| EFW                   | 0.016                         | 0.003  | 0.029 | 0.015 | 0.022                          | 0.012  | 0.033 | 0.000 |
| <b>Late pregnancy</b> |                               |        |       |       |                                |        |       |       |
| HC                    | -0.020                        | -0.113 | 0.072 | 0.668 | 0.007                          | -0.006 | 0.020 | 0.310 |
| AC                    | -0.009                        | -0.079 | 0.061 | 0.800 | 0.017                          | 0.006  | 0.028 | 0.003 |
| FL                    | 0.025                         | -0.057 | 0.107 | 0.549 | 0.009                          | -0.005 | 0.022 | 0.223 |
| EFW                   | 0.015                         | 0.006  | 0.025 | 0.002 | 0.013                          | 0.003  | 0.023 | 0.009 |
| <b>Birth size</b>     |                               |        |       |       |                                |        |       |       |
| Height                | 0.014                         | 0.000  | 0.028 | 0.046 | 0.022                          | 0.008  | 0.035 | 0.002 |
| Weight                | 0.037                         | 0.025  | 0.049 | 0.000 | 0.031                          | 0.019  | 0.043 | 0.000 |
| <b>birth outcome</b>  |                               |        |       |       |                                |        |       |       |
| PB                    | 1.149                         | 1.074  | 1.231 | 0.000 | 0.988                          | 0.924  | 1.057 | 0.728 |
| LGA                   | 1.106                         | 1.061  | 1.154 | 0.000 | 1.144                          | 1.096  | 1.195 | 0.000 |
| LBW                   | 1.044                         | 0.971  | 1.123 | 0.242 | 0.974                          | 0.898  | 1.058 | 0.536 |
| Macrosomia            | 1.128                         | 1.051  | 1.209 | 0.001 | 1.144                          | 1.074  | 1.218 | 0.000 |
|                       | Family history of diabetes=NO |        |       |       | Family history of diabetes=YES |        |       |       |
| <b>Mid pregnancy</b>  |                               |        |       |       |                                |        |       |       |
| HC                    | 0.001                         | -0.005 | 0.008 | 0.660 | -0.004                         | -0.017 | 0.009 | 0.566 |
| AC                    | 0.010                         | 0.003  | 0.017 | 0.007 | 0.017                          | 0.002  | 0.032 | 0.031 |
| FL                    | 0.009                         | 0.000  | 0.019 | 0.050 | 0.010                          | -0.009 | 0.029 | 0.290 |

|                       |        |        |       |       |       |        |       |       |
|-----------------------|--------|--------|-------|-------|-------|--------|-------|-------|
| EFW                   | 0.018  | 0.009  | 0.027 | 0.000 | 0.024 | 0.002  | 0.045 | 0.029 |
| <b>Late pregnancy</b> |        |        |       |       |       |        |       |       |
| HC                    | -0.012 | -0.069 | 0.045 | 0.686 | 0.010 | -0.011 | 0.030 | 0.362 |
| AC                    | 0.000  | -0.043 | 0.043 | 0.999 | 0.016 | -0.002 | 0.035 | 0.085 |
| FL                    | 0.020  | -0.031 | 0.070 | 0.449 | 0.013 | -0.010 | 0.035 | 0.269 |
| EFW                   | 0.014  | 0.006  | 0.021 | 0.001 | 0.014 | -0.003 | 0.030 | 0.108 |
| <b>Birth size</b>     |        |        |       |       |       |        |       |       |
| Height                | 0.018  | 0.007  | 0.028 | 0.002 | 0.020 | -0.003 | 0.042 | 0.082 |
| Weight                | 0.034  | 0.024  | 0.043 | 0.000 | 0.032 | 0.012  | 0.052 | 0.002 |
| <b>birth outcome</b>  |        |        |       |       |       |        |       |       |
| PB                    | 1.059  | 1.005  | 1.117 | 0.033 | 1.054 | 0.941  | 1.181 | 0.365 |
| LGA                   | 1.140  | 1.102  | 1.179 | 0.000 | 1.064 | 0.997  | 1.135 | 0.061 |
| LBW                   | 1.030  | 0.969  | 1.094 | 0.344 | 0.941 | 0.828  | 1.071 | 0.357 |
| Macrosomia            | 1.135  | 1.076  | 1.196 | 0.000 | 1.123 | 1.016  | 1.241 | 0.024 |

---

Abbreviations: HC, head circumference; AC, abdominal circumference; FL, femur length; EFW, estimated fetal weight. PB, premature birth; LGA, large for gestational age; LBW, low birth weight; OR, odds ratio; CI, confidence interval.

All models were conducted adjusted for maternal age, education level, physical activity level, parity, gestational weight gain throughout pregnancy, family history of hypertension disease, and family history of diabetes.

**Supplementary Table 3.** Interaction P-values of age, parity, family history of diabetes, and fetal sex with pre-pregnancy BMI.

| Characteristics         | P-interact |        |                            |       |
|-------------------------|------------|--------|----------------------------|-------|
|                         | Age        | Parity | Family history of diabetes | Sex   |
| <b>Mid pregnancy</b>    |            |        |                            |       |
| HC                      | 0.801      | 0.318  | 0.887                      | 0.408 |
| AC                      | 0.275      | 0.759  | 0.453                      | 0.542 |
| FL                      | 0.400      | 0.781  | 0.678                      | 0.665 |
| EFW                     | 0.581      | 0.955  | 0.722                      | 0.246 |
| <b>Late pregnancy</b>   |            |        |                            |       |
| HC                      | 0.478      | 0.693  | 0.616                      | 0.441 |
| AC                      | 0.803      | 0.467  | 0.811                      | 0.406 |
| FL                      | 0.919      | 0.723  | 0.908                      | 0.981 |
| EFW                     | 0.997      | 0.160  | 0.495                      | 0.715 |
| <b>Birth size</b>       |            |        |                            |       |
| Weight                  | 0.817      | 0.714  | 0.984                      | 0.368 |
| Height                  | 0.948      | 0.689  | 0.375                      | 0.976 |
| <b>Neonatal outcome</b> |            |        |                            |       |
| PB                      | 0.118      | 0.894  | 0.406                      | 0.002 |
| LGA                     | 0.652      | 0.728  | 0.042                      | 0.075 |
| LBW                     | 0.811      | 0.612  | 0.221                      | 0.168 |
| macrosomia              | 0.858      | 0.838  | 0.526                      | 0.468 |

Abbreviations: HC, head circumference; AC, abdominal circumference; FL, femur length; EFW, estimated fetal weight. PB, premature birth; LGA, large for gestational age; LBW, low birth weight; OR, odds ratio; CI, confidence interval.

All models were conducted adjusted for maternal age, education level, physical activity level, parity, gestational weight gain throughout pregnancy, family history of hypertension disease, and family history of diabetes.
